# Supplementary material
Source: publisher site journal article supplement (https://www.dovepress.com/article/576489)
Supplement: Supplementary file 1 [file 576489_Supplementary%20material.docx]

**Supplementary Material**


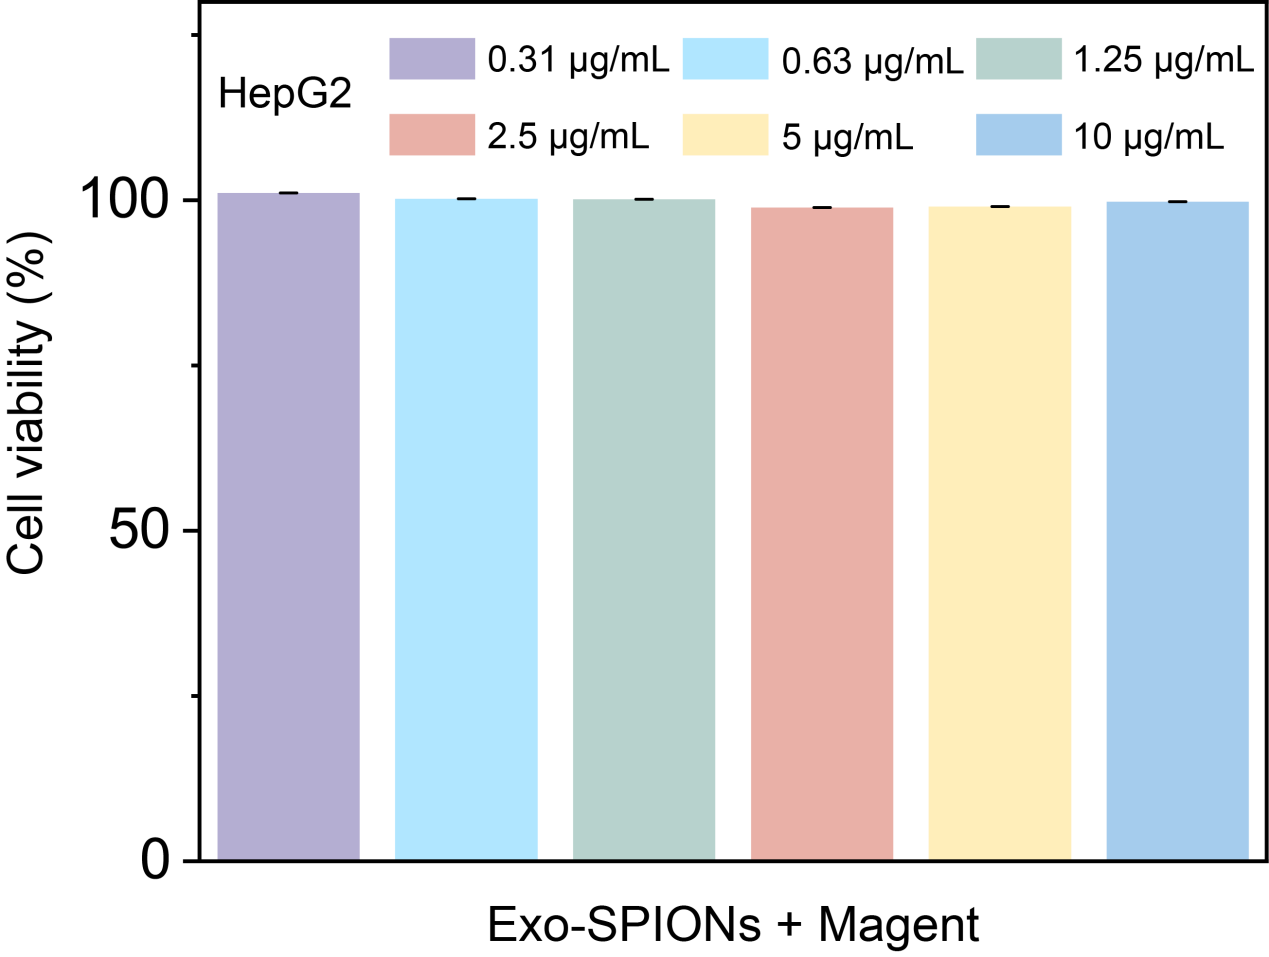


**Fig. S1.** HepG2 cells were treated with different concentrations of Exo-SPIONs for cell viability detection under magnetic field conditions.


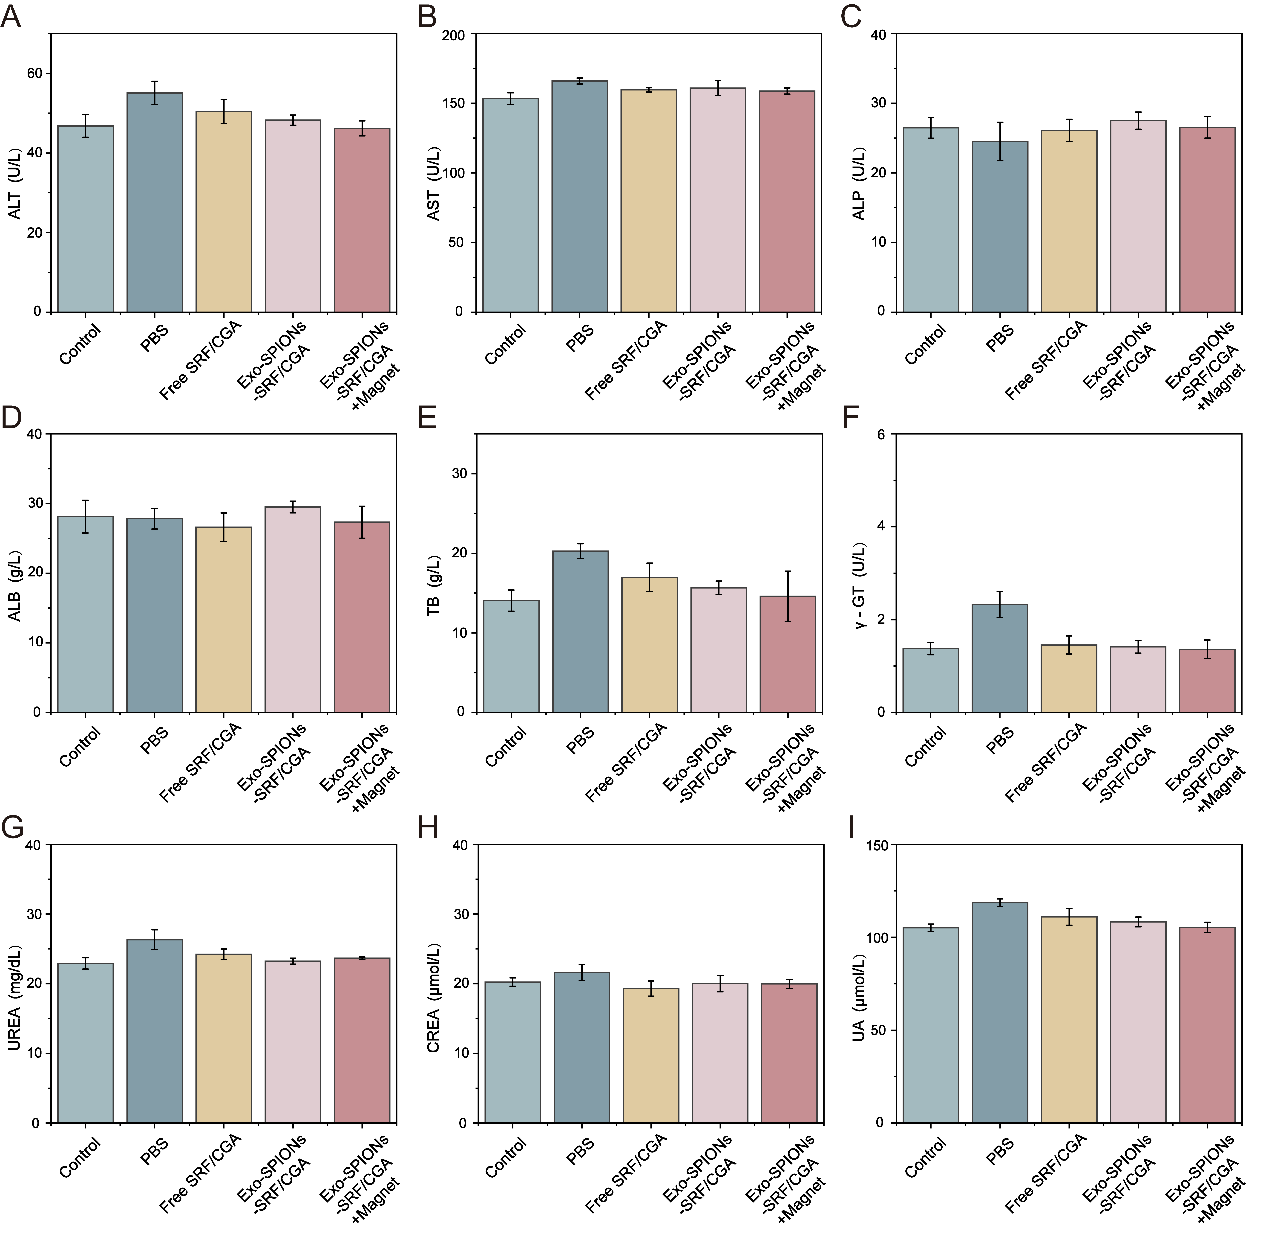


**Fig. S2.** Biosafety assessment of Exo-SPIONs-SRF/CGA *in vivo*. Blood biochemical parameters were analyzed in mice after 18-day treatment with PBS, Exo-SPIONs, SRF/CGA, Exo-SPIONs-SRF/CGA, and Exo-SPIONs-SRF/CGA+Magnet.


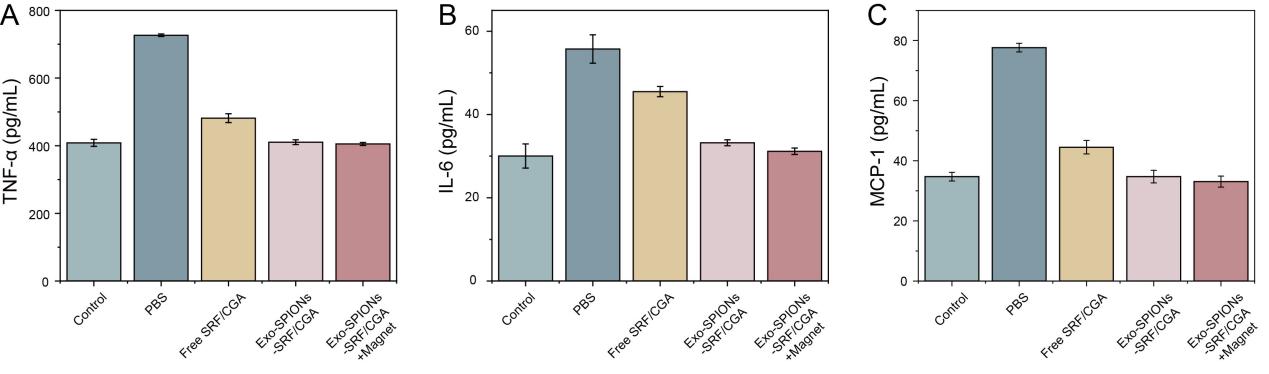


**Fig. S3.** ELISA measurement of TNF-α, IL-6 and MCP-1 levels in mouse serum. After 18 days of treatment with PBS, Exo-SPIONs, SRF/CGA, Exo-SPIONs-SRF/CGA, and Exo-SPIONs-SRF/CGA + Magnet, TNF-α, IL-6 and MCP-1 levels in mouse serum were analyzed.
